# Supplementary material for: Synthesis and properties of poly(benzoxazole imide)s derived from two isomeric diamines containing a benzoxazole moiety
Source: Royal Society of Chemistry journal article supplement (doi:10.1039/c9py01832h), 2020-01-01
Supplement: c9py01832h1.pdf [file c9py01832h1.pdf]

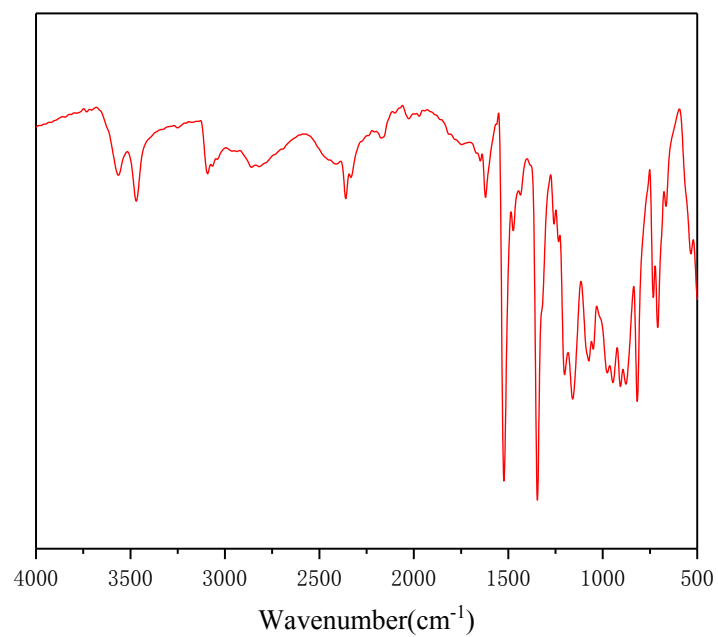

**Figure S1.** FTIR spectrum of **1a**.

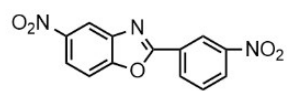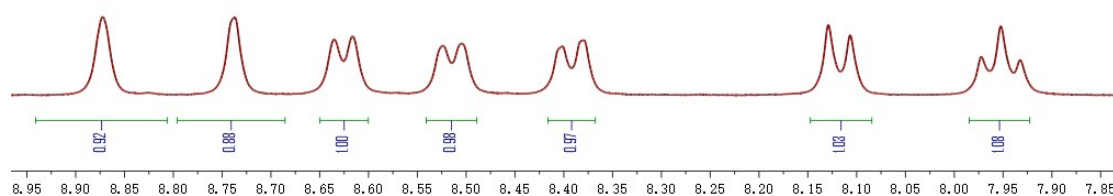

**Figure S2.** <sup>1</sup>H NMR spectrum of **1a**.

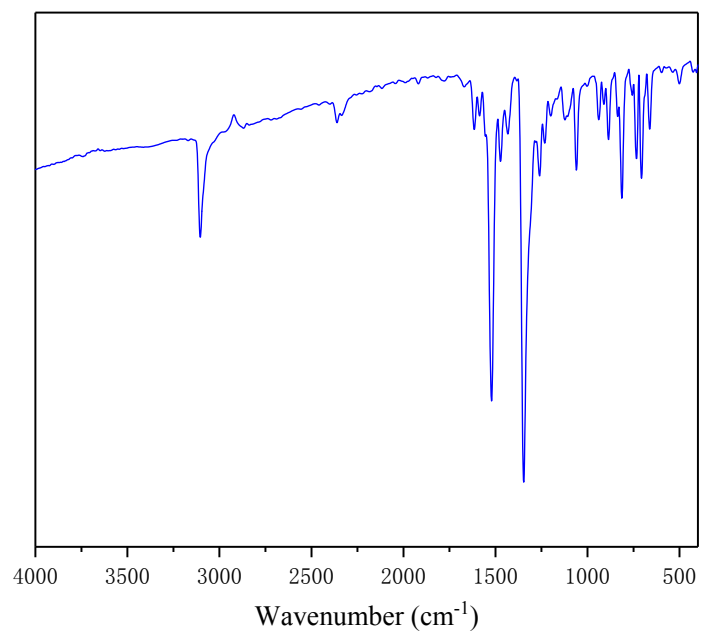

**Figure S3.** FTIR spectrum of **1b**.

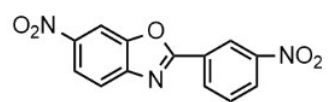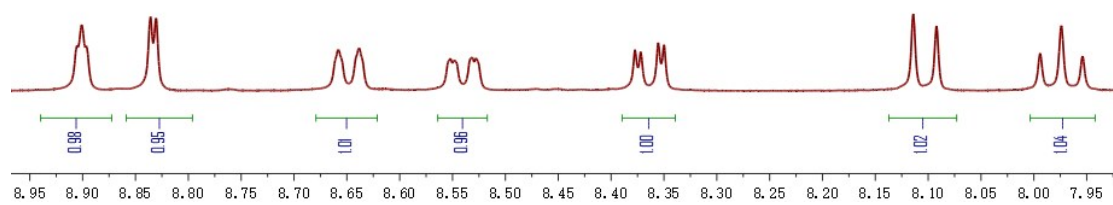

**Figure S4.**  $^1\text{H}$  NMR spectrum of **1b**

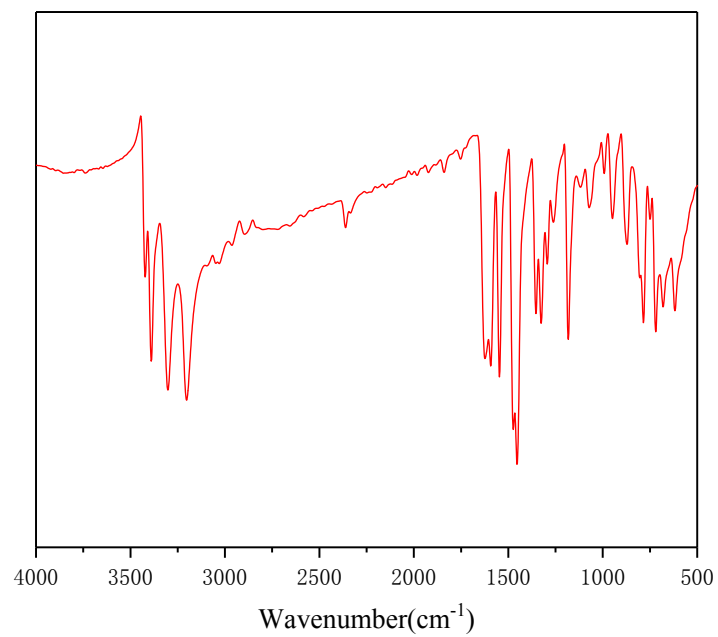

**Figure S5.** FTIR spectrum of **2a**.

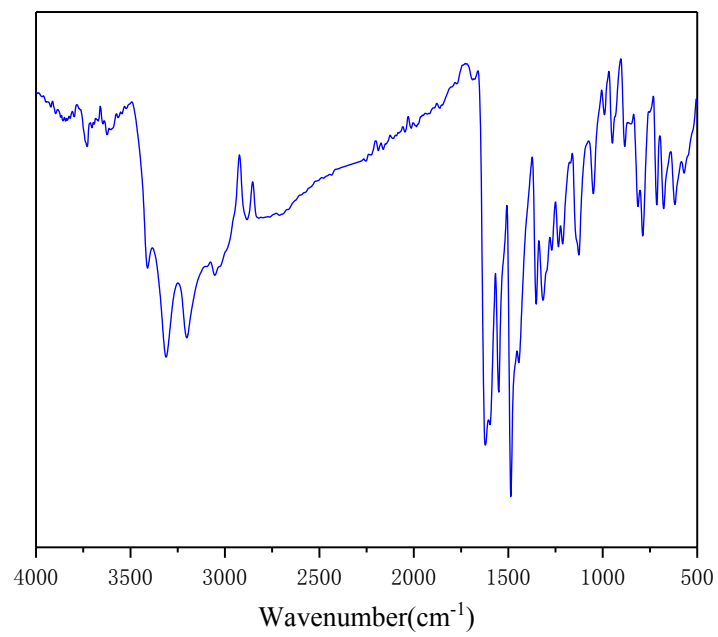

**Figure S6.** FTIR spectrum of **2b**
